# Supplementary material
Source: publisher figshare collection journal article supplement (https://tandf.figshare.com/ndownloader/files/14561201)
Supplement: Supplementary file 1 [file 14561201]

## SPPLEMENTARY MATERIAL

### Network Pharmacology Uncovers Anti-cancer Activity of Vibsane-Type Diterpenes from *Viburnum odoratissimum*

Ying-Ying Zhang<sup>1</sup>, Jing-Jie Chen<sup>1</sup>, Dan-Qi Li<sup>2</sup>, Yan-Zhang<sup>1</sup>, Xiao-Bo Wang<sup>1,3\*</sup>, Guo-Dong Yao<sup>1\*</sup> and Shao-Jiang Song<sup>1\*</sup>

<sup>1</sup> *School of Traditional Chinese Materia Medica, Key Laboratory of Computational Chemistry-Based Natural Antitumor Drug Research & Development, Liaoning Province, Shenyang 110016, People's Republic of China;*

<sup>2</sup> *Institute of Functional Molecules, Shenyang University of Chemical Technology, Shenyang 110142, People's Republic of China;*

<sup>3</sup> *Chinese People's Liberation Army 210 Hospital, Dalian 116021, People's Republic of China*

\*Correspondence to: E-mail: songsj99@163.com (Shao-Jiang Song); guodong\_yao@126.com; (Guo-Dong Yao); wxbbenson0653@sina.com (Xiao-Bo Wang)

Tel. /fax: +86 24 23986510 (Shao-Jiang Song); +86 24 23986510 (Guo-Dong Yao); +04 11 39847094 (Xiao-Bo Wang)

## **Network Pharmacology Uncovers Anti-cancer Activity of Vibsane-Type Diterpenes from *Viburnum odoratissimum***

### **Abstract**

Vibsane-type diterpenes, the characteristic compounds of *Viburnum odoratissimum*, exhibited significant cytotoxicity in many cancer cells. To search for the potential target of vibsane-type diterpenes on lung cancer, we combined methods of network pharmacology prediction and experimental verification. 80 active ingredients, 23 potential targets and 39 related pathways were analysed through constructing the compound-target network and target-pathway network, and the potential target (EGFR) and key pathway (PI3K/Akt) were identified. Vibsanol C, an isolated vibsane-type diterpene with excellent cytotoxicity against lung cancer cells was chosen for further confirmation. Molecular docking study and drug affinity responsive target stability (DARTS) approach further indicated that EGFR is a direct target of Vibsanol C. Moreover, mechanistic studies revealed Vibsanol C might affect PI3K/Akt pathway by Western blot analysis. In conclusion, this study successfully predicted and confirmed the potential target of Vibsane-type diterpenes on lung cancer.

**Keywords:** Vibsane-type diterpenes; lung cancer; network pharmacology; drug affinity responsive target stability; epidermal growth factor receptor

## List of supplementary content

### Experimental

**Figure S1** Process overview.

**Figure S2.1** HRESIMS spectrum of **Vibsanol C**.

**Figure S2.2**  $^1\text{H}$  NMR spectrum (300 MHz,  $\text{CD}_3\text{OD}$ ) of **Vibsanol C**.

**Figure S2.3**  $^{13}\text{C}$  NMR spectrum (150 MHz,  $\text{CD}_3\text{OD}$ ) of **Vibsanol C**.

**Figure S3** Identification the protein target.

**Figure S4** Target-pathway network.

**Figure S5** Western blot results.

**Table S1** Chemical ingredients database.

**Table S2** Potential targets database.

**Table S3** The parameters of pathways.

## Experimental

### *Chemicals and reagents*

The dried leaves of *V. odoratissimum* were obtained from Xishuangbanna Tropical Botanical Garden (Yunnan, China) in 2014 and were identified by Professor Pan Bo (Xishuangbanna Tropical Botanical Garden, Chinese Academy of Sciences). The air-dried leaves of *V. odoratissimum* (7.3 Kg) were flash extracted third with 75% EtOH. The ethanol extract was concentrated and loaded onto a D101 macroporous resin column using an EtOH/H<sub>2</sub>O gradient. And then separated by vacuum liquid chromatography, CHP20 CC and sephadex LH-20 column chromatography, the separation was subjected to the Silica gel column, preparative HPLC and semi-preparative HPLC to yield Vibsanol C (5 mg). The reagent was dissolved in dimethylsulfoxide (DMSO) at a stock concentration of 50 mM.

Fetal bovine serum (FBS) was purchased from Tianjin Haoyang Biotechnology Co., Ltd, (Tianjin, China). Dulbecco's modified Eagle's medium (DMEM), Phosphate balanced solution (PBS) and Antibiotics (100 U/mL penicillin, 100 µg/mL streptomycin) were purchased from HyClone, Inc (Utah, USA). EGFR, PI3K, Akt, p-Akt, p-GSK3β and β-actin and horseradish-peroxidase-conjugated secondary antibodies (goat anti-rabbit or goat anti-mouse) were purchased from Santa Cruz Biotechnology (CA, USA). PVDF membranes (0.2 µm) were purchased from Millipore (Massachusetts, USA). Coomassie blue fast staining solution were purchased from Beyotime, (Shanghai, China).

### *Database construction*

Based on the vibsane-type diterpenes retrieved through literature, a database consisting of 80 natural products was established (**Table S1**), which was based on the reported vibsane-type diterpenes from the family *V. odoratissimum*. ChemBioDraw (<http://www.cambridgesoft.com/>) was used to make 3D chemical structural formulas of the ingredients, which were saved in “mol2” format.

Up to 23 protein targets (**Table S2**) related to lung cancer were obtained. The candidate proteins were data-mined from literatures and public database sources, including PubMed ([www.PubMed.org](http://www.PubMed.org)), Therapeutic Targets Database (TTD;

<http://bidd.nus.edu.sg/group/ttd/>). The X-ray or NMR structures of the proteins for docking were downloaded from the RCSB Protein Data Bank (<http://www.pdb.org/>) by the following criteria: (a) the source organism is human; (b) the structure should contain an original ligand to define the active site for docking; (c) the resolution of the structure of the protein–ligand complex is below 3 Å. At the same time, the protein structures were prepared with Sybyl-X (version 2.0, TRIPOS Inc.), including addition of hydrogen atoms as well as removal of co-crystallised ligands and water molecules from the complexes.

### ***Molecular docking***

Molecular docking, which plays an important role in the rational drug design, is frequently used to predict the binding sites and binding pose(s) of drug candidates to their targets and also to estimate the binding affinity of the molecules (Kitchen et al. 2004). Surflex-Dock plug-in included in the Sybyl-X (version 2.0, TRIPOS Inc.) was used to perform molecular docking. The binding ability was evaluated using a scoring function analysis and the higher docking score represent better binding ability. For docking studies with Surflex-Dock, the ligand binding site protocol was generated using the ligand option in which the X-ray co-crystallised ligand pose was specified as references. The visualization of intermolecular forces between candidate compound and potential target was performed on Discovery Studio 4.5 program.

### ***Network construction and analysis***

To facilitate scientific interpretation of complex relationships among the compounds, targets and pathways, the C-T network and T-P network were generated by Cytoscape 3.2.1 (<http://www.cytoscape.org/>), which is an open source software project for analysis and visualization of biological networks (Sheng et al. 2014).

The interaction between molecules and target proteins (docking scores greater than 6.0) were chosen to generate a C-T network in which nodes represent molecules or target proteins. For each of these 23 compounds, the top 10 targets with degree higher than 30 were selected to as the potential targets.

### ***Cell culture***

Human lung cancer A549 cells were obtained from American Type Culture

Collection (ATCC) (Manassas, VA, USA). Cells were cultured in DMEM medium (HyClone, Utah, USA) supplemented with 10% fetal bovine serum FBS (TBD, Tianjin, China), 100 units/mL penicillin, and 100  $\mu$ g/mL streptomycin (HyClone, Utah, USA). Cells were incubated at 37°C with 5% CO<sub>2</sub> in a humidified atmosphere. All experiments were performed on logarithmically growing cells.

#### ***Target identification using drug affinity responsive target stability***

A549 cells ( $1 \times 10^6$ /mL, 2 mL) were seeded into dishes and allowed to grow for 24 h, then under standard culture conditions were treated with Vibsanol C (40  $\mu$ M) in DMSO or with DMSO alone (control). At the end of 1h (treatment time), cell lysates were prepared in Cell Lysis (0.5% NP40) buffer with 1 mM PMSF (protease inhibitor) on ice for 30 min, followed by centrifugation. Protein concentration was measured with the BCA Protein Assay Kit to ensure that there was between 2.5 mg/mL and 5 mg/mL of protein. For proteolysis, each cellular lysate sample was proteolysed at room temperature for 30 min with pronase 1:2000 ratios of Pronase versus cell lysates protein concentration were used for proteolysis. Samples were loaded on SDS-PAGE and run in 1  $\times$  SDS running buffer. At the end, gels were stained with Coomassie blue (Lomenick et al. 2011).

#### ***Western blot analysis***

The total cellular samples were harvested and lysed in RIPA buffer [250 mM Tris-HCl (pH 6.8), 4% SDS, 10% glycerol, 0.006% bromophenol blue, 2%  $\beta$ -mercaptoethanol, 50 mM sodium fluoride, and 5 mM sodium orthovanadate] and boiled for 10 min at 100 °C. Equal amount of protein (30  $\mu$ g) were separated on a 10% SDS-PAGE gel and transferred to nitrocellulose membranes. The membranes were blocked with 5% BSA and probed with a primary antibody followed by the corresponding secondary antibody. Immunoreactive bands were visualized with a chemiluminescence kit (ThermoFisher, Waltham, USA) followed by incubation with HRP-conjugated secondary antibodies. The densities of protein bands were calculated by the ImageJ software (National Institutes of Health, Wayne Rasband, USA).

#### ***Statistical analysis***

All results were calculated as the mean  $\pm$  SD for at least three independent

experiments. Experimental data were analysed by one-way or two-way ANOVAs using GraphPad Prism version 6.0 (GraphPad Software, San Diego, CA, USA). Statistical significance was considered at  $P < 0.05$ .

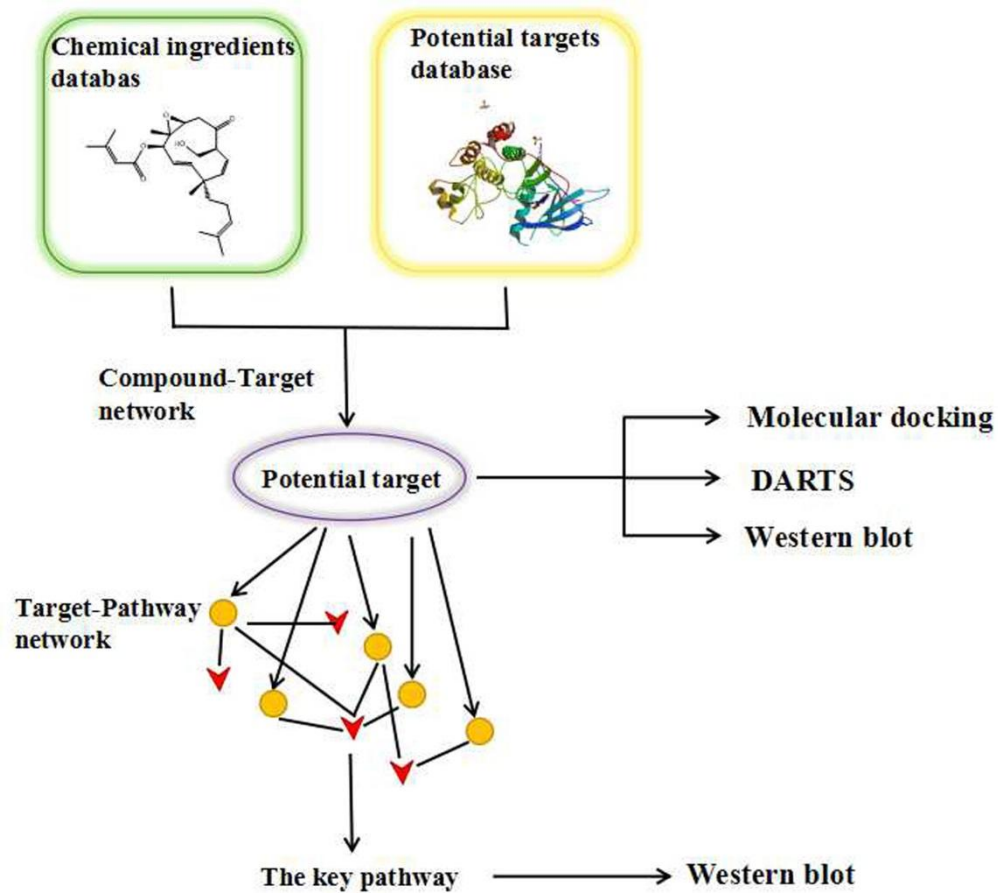

**Figure S1.** Process overview.

## Mass Spectrum Molecular Formula Report

### Analysis Info

Analysis Name D:\Data\20151113CEYANG\IB-41\_1-E\_4\_01\_5951.d  
 Method 20131026\_ceyang.m  
 Sample Name IB-41  
 Comment

Acquisition Date 11/13/2015 3:43:07 PM

Instrument / Ser# Bruker Customer  
 Operator microTOF-Q 125

### Acquisition Parameter

|             |          |                       |           |                  |           |
|-------------|----------|-----------------------|-----------|------------------|-----------|
| Source Type | ESI      | Ion Polarity          | Positive  | Set Nebulizer    | 1.2 Bar   |
| Focus       | Active   | Set Capillary         | 4500 V    | Set Dry Heater   | 180 °C    |
| Scan Begin  | 50 m/z   | Set End Plate Offset  | -500 V    | Set Dry Gas      | 8.0 l/min |
| Scan End    | 3000 m/z | Set Collision Cell RF | 400.0 Vpp | Set Divert Valve | Source    |

### Generate Molecular Formula Parameter

|                  |                        |         |
|------------------|------------------------|---------|
| Formula, min.    |                        |         |
| Formula, max.    |                        |         |
| Measured m/z     | Tolerance              | Charge  |
| Check Valence    | Minimum                | Maximum |
| Nitrogen Rule    | Electron Configuration |         |
| Filter H/C Ratio | Minimum                | Maximum |
| Estimate Carbon  |                        |         |

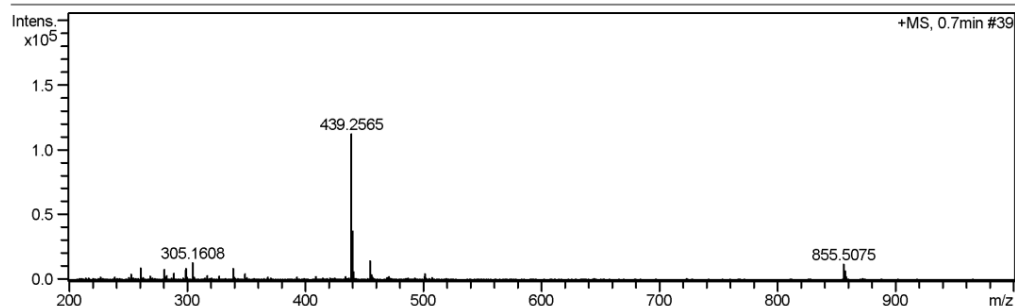

Figure S2.1 HRESIMS spectrum of Vibsanol C.

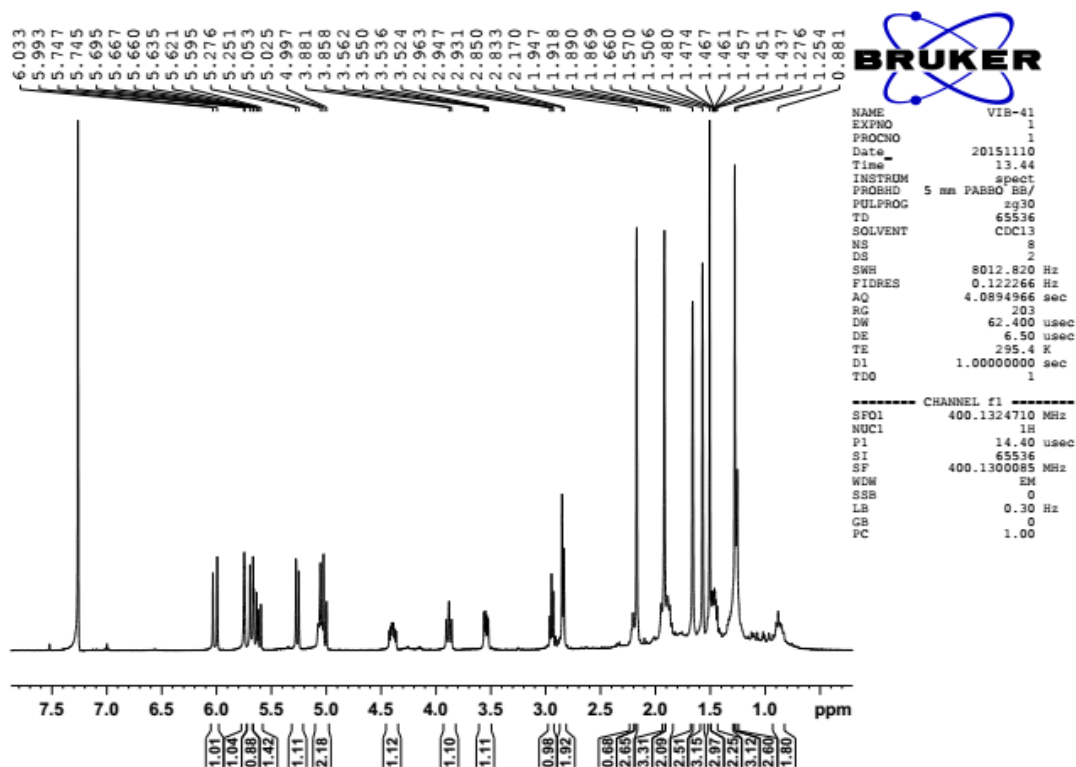

Figure S2.2 <sup>1</sup>H NMR spectrum (400 MHz, CDCl<sub>3</sub>) of Vibsanol C.



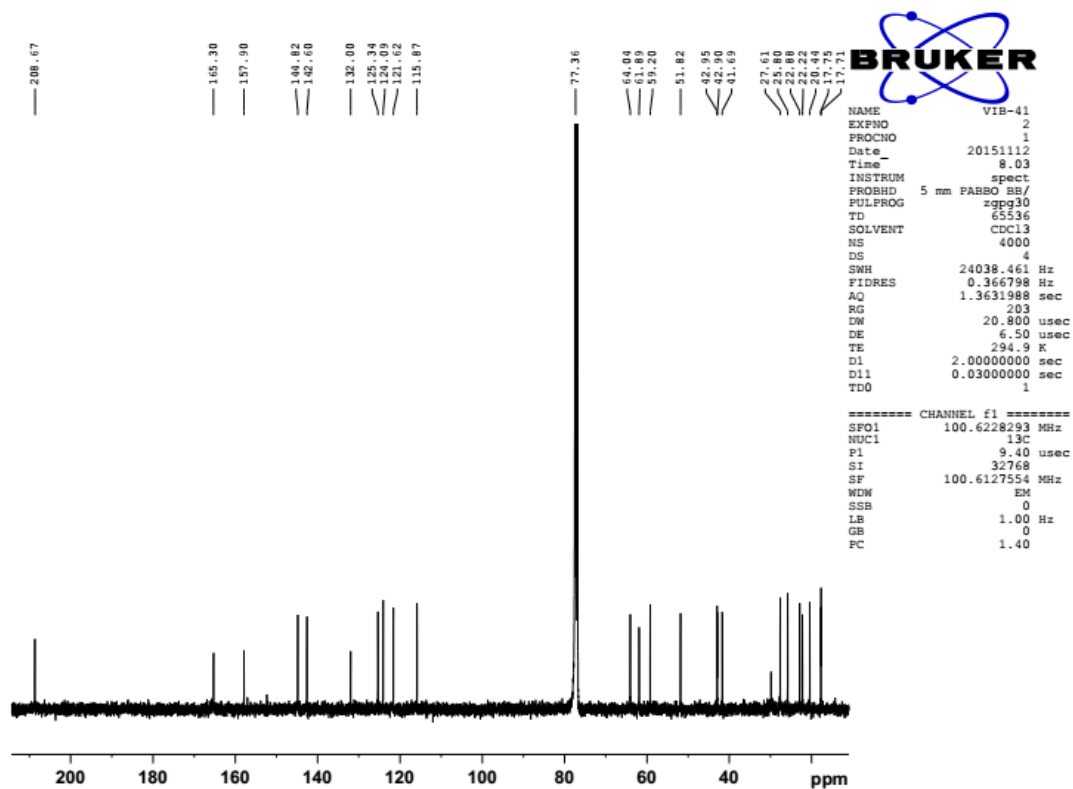

Figure S2.3  $^{13}\text{C}$  NMR spectrum (100 MHz,  $\text{CDCl}_3$ ) of Vibsanol C.

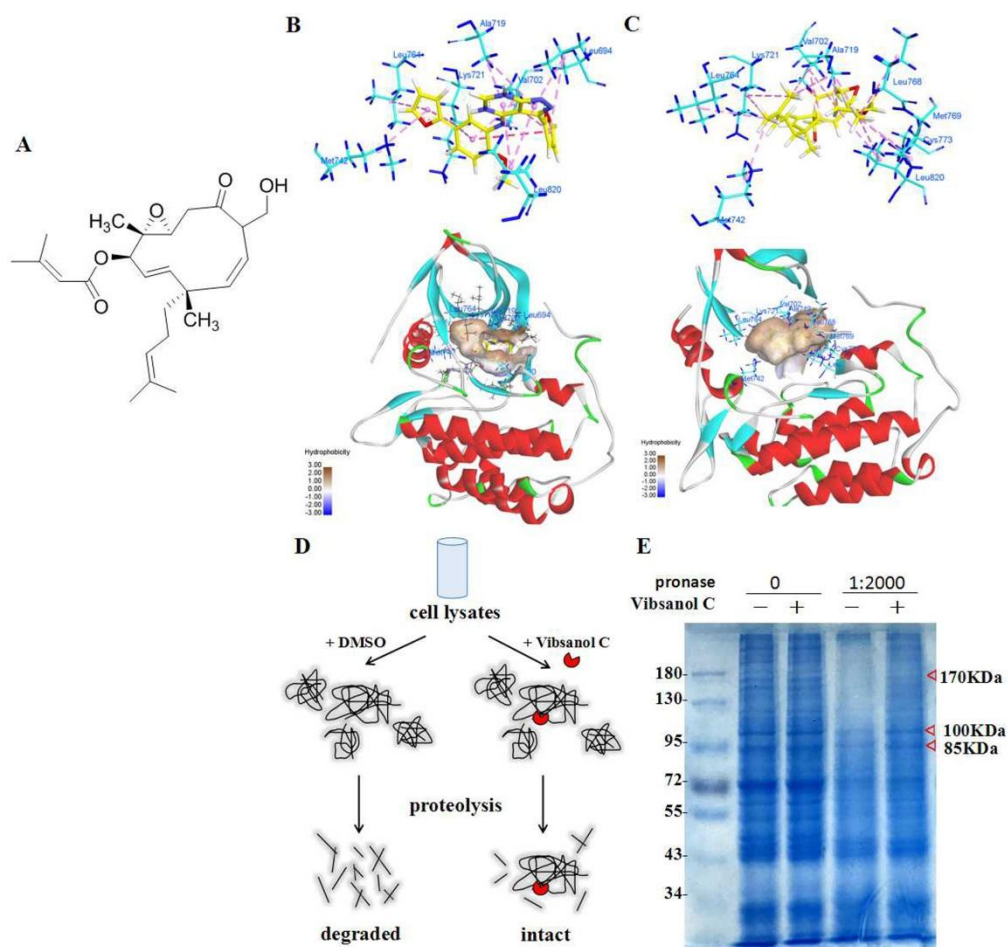

**Figure S3.** Identification the protein target. (A) The structure of Vibsanol C. (B) The binding mode of ligand in the active site of EGFR pocket. (C) The binding mode of Vibsanol C in the active site of EGFR pocket. Vibsanol C (yellow carbon) and amino acids residues (cyan carbon) were presented in sticks. Hydrophobic interactions were highlighted in carnation dashed lines. Hydrophobic surface in receptor residues were indicated from blue for hydrophilic to brown for hydrophobic. (D) Illustration of the DARTS method. (E) Target identification of Vibsanol C using drug affinity responsive target stability (DARTS). Red triangle flanks the protected band.



The denomination and structures of the Vibsane-type diterpenes

| NO | Structure                                                                           | 名称          |
|----|-------------------------------------------------------------------------------------|-------------|
| 1  | 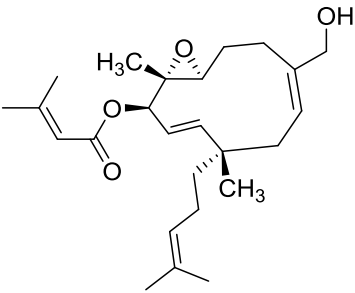   | Vibsantin A |
| 2  |    | Vibsantin P |
| 3  |  | Vibsantin Q |
| 4  |  | Vibsantin R |

|          |                                                                                     |                             |
|----------|-------------------------------------------------------------------------------------|-----------------------------|
| <p>5</p> | 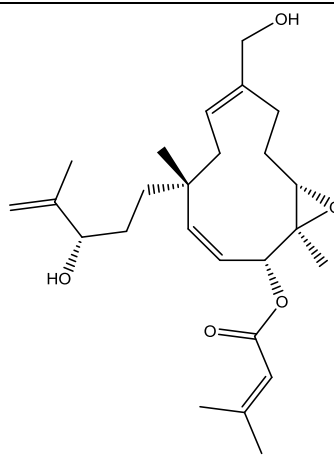   | <p>Vibsanin S</p>           |
| <p>6</p> |   | <p>Vibsanin T</p>           |
| <p>7</p> |  | <p>Vibsanin F</p>           |
| <p>8</p> |  | <p>14-Hydroxyvibsanin F</p> |

|    |                                                                                     |            |
|----|-------------------------------------------------------------------------------------|------------|
| 9  | 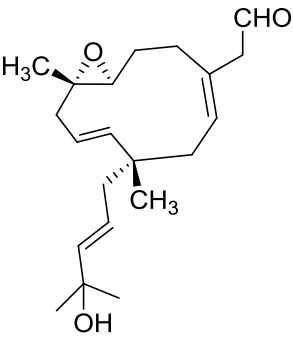   | Vibsanin V |
| 10 |    | Vibsanol H |
| 11 |   | Vibsanin L |
| 12 |  | Vibsanol E |
| 13 |  | Vibsanol G |

|    |                                                                                     |            |
|----|-------------------------------------------------------------------------------------|------------|
| 14 | 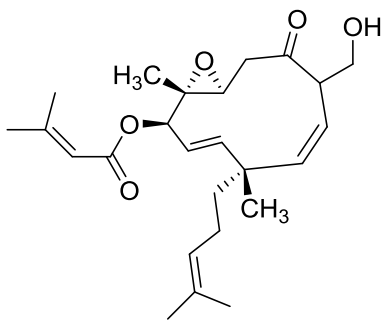   | Vibsanol C |
| 15 |    | Vibsanol D |
| 16 |   | Vibsanol F |
| 17 |  | Vibsanin X |
| 18 |  | Vibsanin B |

|    |                                                                                     |            |
|----|-------------------------------------------------------------------------------------|------------|
| 19 | 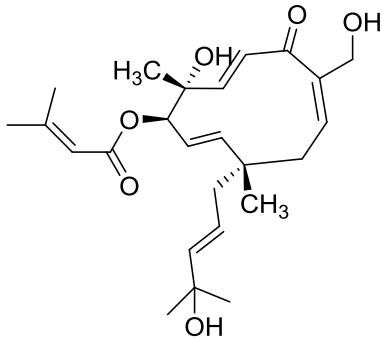   | Vibsanol A |
| 20 |    | Vibsanol B |
| 21 |   | Vibsanin U |
| 22 |  | Vibsanin C |
| 23 |  | Vibsanin D |



|    |                                                                                                                                                                                                                                                                                                                                                                                                                                                                                                                                                                                         |                  |
|----|-----------------------------------------------------------------------------------------------------------------------------------------------------------------------------------------------------------------------------------------------------------------------------------------------------------------------------------------------------------------------------------------------------------------------------------------------------------------------------------------------------------------------------------------------------------------------------------------|------------------|
| 24 | 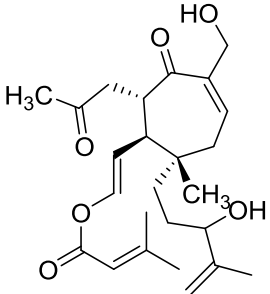 <p>The structure of Vibsantin G is a complex polycyclic molecule. It features a central eight-membered ring with a ketone group (=O) and a hydroxymethyl group (-CH<sub>2</sub>OH) at the top. A side chain on the left includes a methyl ketone group (-C(=O)CH<sub>3</sub>). Another side chain on the right contains a hydroxyl group (-OH) and a methyl group (-CH<sub>3</sub>). A third side chain at the bottom includes an ester group (-O-C(=O)-) and a vinyl group (-CH=CH<sub>2</sub>).</p> | Vibsantin G      |
| 25 |  <p>The structure of Vibsantin I is similar to Vibsantin G but with a different side chain at the bottom. It features a hydroperoxide group (-OOH) instead of a vinyl group.</p>                                                                                                                                                                                                                                                                                                                       | Vibsantin I      |
| 26 |  <p>The structure of Vibsantin H is similar to Vibsantin G but with a different side chain at the bottom. It features a hydroxyl group (-OH) and a methyl group (-CH<sub>3</sub>) instead of a vinyl group.</p>                                                                                                                                                                                                                                                                                       | Vibsantin H      |
| 27 |  <p>The structure of Vibsantin K is similar to Vibsantin G but with a different side chain at the bottom. It features a hydroperoxide group (-OOH) instead of a vinyl group.</p>                                                                                                                                                                                                                                                                                                                     | Vibsantin K      |
| 28 |  <p>The structure of 5-Epivibsantin C is similar to Vibsantin G but with a different side chain at the bottom. It features a vinyl group (-CH=CH<sub>2</sub>) instead of a hydroperoxide group.</p>                                                                                                                                                                                                                                                                                                  | 5-Epivibsantin C |

|    |                                                                                     |                                                          |
|----|-------------------------------------------------------------------------------------|----------------------------------------------------------|
| 29 | 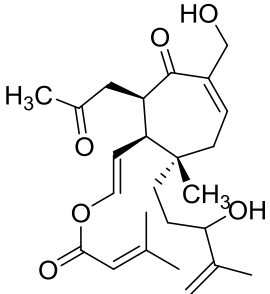   | 5-Epivibsanin G                                          |
| 30 |    | (14 <i>R</i> <sup>*</sup> )-14,<br>15-Epoxyvibsanin<br>C |
| 31 |   | (14 <i>S</i> <sup>*</sup> )-14,<br>15-Epoxyvibsanin<br>C |
| 32 |  | Vibsanin W                                               |
| 33 |  | 15,<br>18-Di- <i>O</i> -methylvib<br>sanin H             |

|    |  |                                      |
|----|--|--------------------------------------|
| 34 |  | 18- <i>O</i> -Methylvihsanin K       |
| 35 |  | 18- <i>O</i> -Methylvihsanin G       |
| 36 |  | 18- <i>O</i> -Methyl-5-epivibsanin K |
| 37 |  | 5-Epivibsanin H                      |
| 38 |  | 5-Epivibsanin K                      |

|    |                                                                                     |                     |
|----|-------------------------------------------------------------------------------------|---------------------|
| 39 | 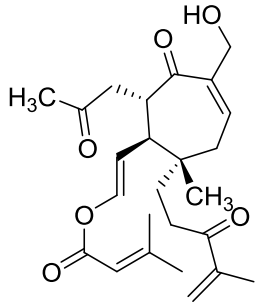   | Dehydrovibsanin G   |
| 40 |    | Vibsanin M          |
| 41 |   | Vibsanin E          |
| 42 |  | 3-Hydroxyvibsanin E |
| 43 |  | 5-Epivibsanin E     |
| 44 |  | Cyclovibsanin A     |

|    |                                                                                     |                                               |
|----|-------------------------------------------------------------------------------------|-----------------------------------------------|
| 45 | 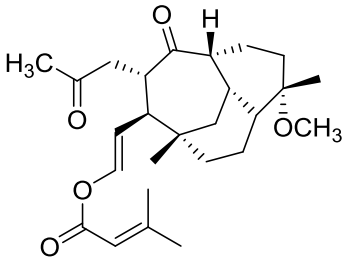   | 15- <i>O</i> -Methylcyclovibsanin A           |
| 46 |    | 15- <i>O</i> -Methylcyclovibsanin B           |
| 47 |   | 3-Hydroxy-15- <i>O</i> -methylcyclovibsanin A |
| 48 |  | Furanovibsanin A                              |
| 49 |  | 3- <i>O</i> -Methylfuranovibsanin A           |
| 50 |  | Furanovibsanin F                              |

|    |                                                                                     |                       |
|----|-------------------------------------------------------------------------------------|-----------------------|
| 51 | 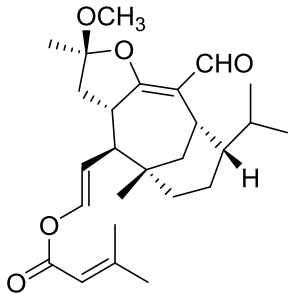   | Furanovibsanin D      |
| 52 |    | Furanovibsanin C      |
| 53 |   | Furanovibsanin B      |
| 54 |  | 7-Epifuranovibsanin B |
| 55 |  | Furanovibsanin E      |

|    |                                                                                     |                     |
|----|-------------------------------------------------------------------------------------|---------------------|
| 56 | 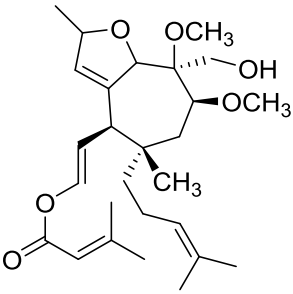   | Furanovibsanin G    |
| 57 |    | Vibsanin O          |
| 58 |   | 7-Epialdovibsanin A |
| 59 |  | Aldovibsanin A      |
| 60 |  | Aldovibsanin B      |

|    |                                                                                     |                        |
|----|-------------------------------------------------------------------------------------|------------------------|
| 61 | 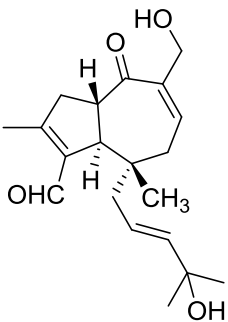   | Aldovibsanin C         |
| 62 |    | Neovibsanin A          |
| 63 |   | Neovibsanin B          |
| 64 |  | Neovibsanin D          |
| 65 |  | 7-Epineovibsanine<br>D |
| 66 |  | Neovibsanin C          |



|    |                                                                                     |                                          |
|----|-------------------------------------------------------------------------------------|------------------------------------------|
| 67 | 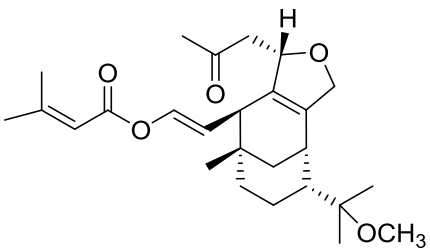   | 15- <i>O</i> -Methylneovibsanin F        |
| 68 |    | 15- <i>O</i> -Methyl-14-epineovibsanin F |
| 69 |   | 15- <i>O</i> -Methyl-18-epineovibsanin F |
| 70 |  | 14-Epineovibsanin G                      |
| 71 |  | Neovibsanin G                            |
| 72 |  | 2- <i>O</i> -Methylneovibsanin H         |

|    |                                                                                     |                                  |
|----|-------------------------------------------------------------------------------------|----------------------------------|
| 73 | 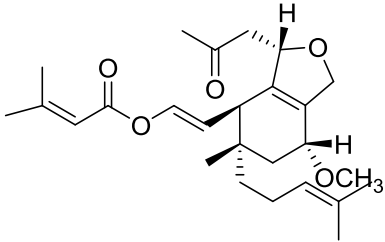   | 2- <i>O</i> -Methylneovibsanin I |
| 74 |    | Neovibsanin H                    |
| 75 |    | Neovibsanin I                    |
| 76 |  | Spirovibsanin A                  |
| 77 |  | Neovibsanin J                    |
| 78 |  | Neovibsanin K                    |

|    |                                                                                   |                   |
|----|-----------------------------------------------------------------------------------|-------------------|
| 79 | 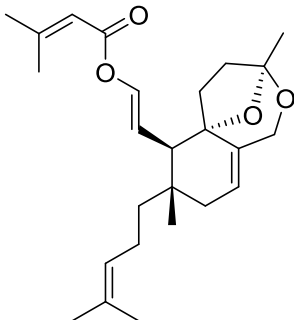 | Neovibsanin P     |
| 80 |  | Vibsaniguration A |

**Table S1** Chemical ingredients database.

| PDB Code | Protein name                                                                   | gene name | Degree | Betweenness Centrality |
|----------|--------------------------------------------------------------------------------|-----------|--------|------------------------|
| 5JEB     | Epidermal growth factor receptor                                               | EGFR      | 52     | 0.14144373             |
| 4OTW     | Receptor tyrosine-protein kinase erbB-3                                        | ERBB3     | 45     | 0.11649773             |
| 5OQ4     | Phosphatidylinositol 4,5-bisphosphate 3-kinase catalytic subunit gamma isoform | PIK3CG    | 44     | 0.09991478             |
| 1T8I     | DNA topoisomerase I                                                            | TOP1MT    | 40     | 0.09078677             |
| 5FXS     | Insulin-like growth factor I receptor                                          | IGF1R     | 40     | 0.07329712             |
| 2OWB     | Serine/threonine-protein kinase PLK1                                           | PLK1      | 39     | 0.07852847             |
| 2XVD     | Ephrin type-B receptor 4                                                       | EPHB4     | 38     | 0.06066649             |
| 5E8A     | Galectin-3                                                                     | LGALS3    | 36     | 0.0857321              |
| 4LXD     | Apoptosis regulator Bcl-2                                                      | BCL2      | 34     | 0.05499905             |
| 2Y6D     | Matrilysin                                                                     | MMP7      | 30     | 0.03476697             |
| 3WZD     | Vascular endothelial growth factor receptor 2                                  | KDR       | 26     | 0.02860663             |
| 1S9I     | Dual specificity mitogen-activated protein kinase kinase 2                     | MAP2K2    | 22     | 0.02702834             |
| 2OW9     | Collagenase 3                                                                  | MMP13     | 20     | 0.01519915             |
| 1JK3     | Macrophage metalloelastase                                                     | MMP12     | 16     | 0.01052782             |
| 4KXQ     | Poly [ADP-ribose] polymerase 1                                                 | Parp1     | 15     | 0.00879503             |

|      |                                               |        |    |            |
|------|-----------------------------------------------|--------|----|------------|
| 5FTQ | ALK tyrosine kinase receptor                  | ALK    | 15 | 0.01335521 |
| 3ZCW | Kinesin-like protein KIF11                    | KIF11  | 10 | 0.0054757  |
| 4QYG | Serine/threonine-protein kinase Chk1          | CHEK1  | 8  | 0.00220729 |
| 5EYD | Hepatocyte growth factor receptor             | MET    | 6  | 0.00129694 |
| 5L3D | Lysine-specific histone demethylase 1A        | KDM1A  | 6  | 0.00136272 |
| 4U0I | Mast/stem cell growth factor receptor         | KIT    | 3  | 0.000347   |
| 1J7Y | Hemoglobin                                    | HBA1   | 2  | 0.0000505  |
| 3HNG | Vascular endothelial growth factor receptor 1 | VEGFR1 | 1  | 0          |

**Table S2** Potential targets database.

| Pathway_ID | Pathway name                              | Degree |
|------------|-------------------------------------------|--------|
| hsa04151   | PI3K-Akt signaling pathway                | 4      |
| hsa01521   | EGFR tyrosine kinase inhibitor resistance | 3      |
| hsa04068   | FoxO signaling pathway                    | 3      |
| hsa04066   | HIF-1 signaling pathway                   | 3      |
| hsa05200   | Pathways in cancer                        | 2      |
| hsa05205   | Proteoglycans in cancer                   | 2      |
| hsa04072   | Phospholipase D signaling pathway         | 2      |
| hsa04020   | Calcium signaling pathway                 | 2      |
| hsa04015   | Rap1 signaling pathway                    | 2      |
| hsa04014   | Ras signaling pathway                     | 2      |
| hsa04012   | ErbB signaling pathway                    | 2      |
| hsa04010   | MAPK signaling pathway                    | 2      |
| hsa05222   | Small cell lung cancer                    | 1      |
| hsa04110   | Cell cycle                                | 1      |
| hsa04022   | cGMP-PKG signaling pathway                | 1      |
| hsa04725   | Cholinergic synapse                       | 1      |
| hsa00562   | Inositol phosphate metabolism             | 1      |
| hsa04722   | Neurotrophin signaling pathway            | 1      |
| hsa04630   | Jak-STAT signaling pathway                | 1      |
| hsa05206   | MicroRNAs in cancer                       | 1      |

|          |                                                          |   |
|----------|----------------------------------------------------------|---|
| hsa05225 | Hepatocellular carcinoma                                 | 1 |
| hsa04510 | mTOR signaling pathway                                   | 1 |
| hsa04217 | Necroptosis                                              | 1 |
| hsa04215 | Apoptosis - multiple species                             | 1 |
| hsa04210 | Apoptosis                                                | 1 |
| hsa04915 | Estrogen signaling pathway                               | 1 |
| hsa04141 | Protein processing in endoplasmic reticulum              | 1 |
| hsa04140 | Autophagy - animal                                       | 1 |
| hsa04064 | NF-kappa B signaling pathway                             | 1 |
| hsa01524 | Platinum drug resistance                                 | 1 |
| hsa04310 | Wnt signaling pathway                                    | 1 |
| hsa05224 | Breast cancer                                            | 1 |
| hsa05218 | Melanoma                                                 | 1 |
| hsa05215 | Prostate cancer                                          | 1 |
| hsa05214 | Glioma                                                   | 1 |
| hsa05202 | Transcriptional misregulation in cancer                  | 1 |
| hsa04152 | AMPK signaling pathway                                   | 1 |
| hsa04150 | mTOR signaling pathway                                   | 1 |
| hsa04550 | Signaling pathways regulating pluripotency of stem cells | 1 |

**Table S3** The parameters of pathways.
